# Supplementary material
Source: PubMed Central journal article supplement (PMC2951228)
Supplement: supp_M109.077453_jbc.M109.077453-1.pdf [file supp_M109.077453_jbc.M109.077453-1.pdf]

1A

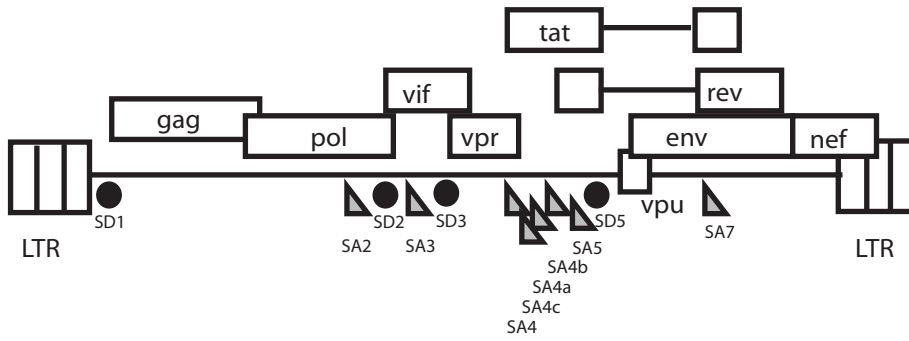

B

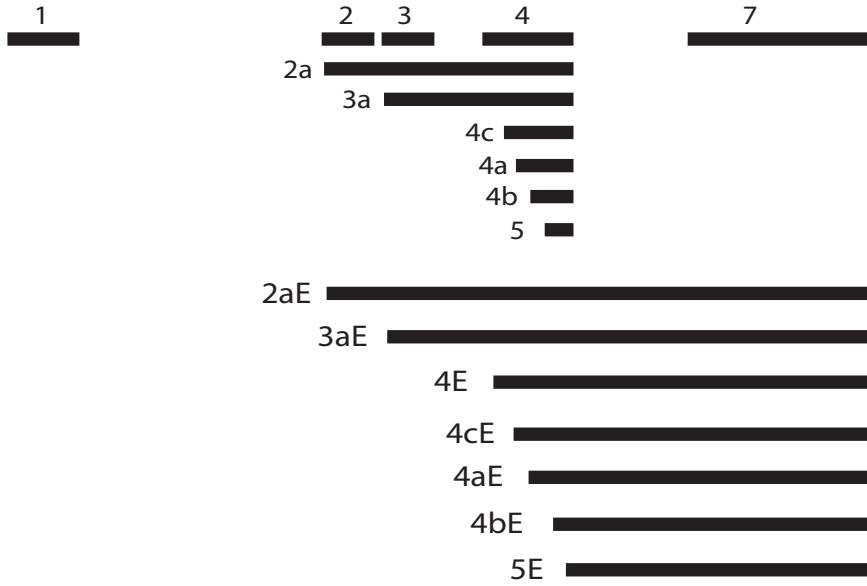

C

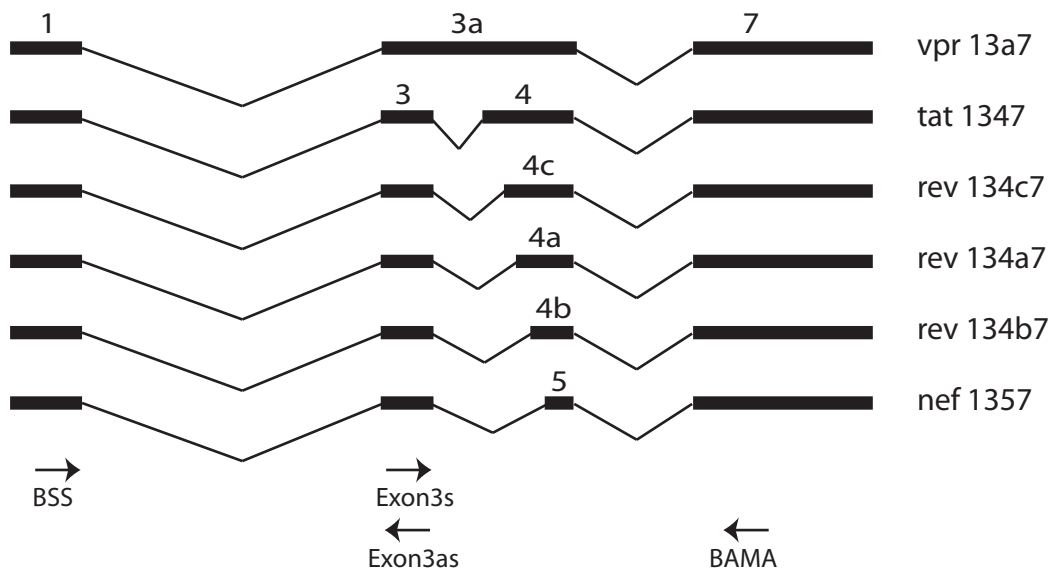

**Supplementary Figure 1. (A)** Schematic representation of the HIV-1 genome, boxes indicate open reading frames, circles indicate 5'-splice sites and triangles indicate 3'-splice sites. Nomenclature of exons and splice sites follows the nomenclature of the Los Alamos HIV-1 sequence database:

[www.hiv.lanl.gov/content/sequence/HIV/COMPENDIUM/1998/INTRO/landmarks.pdf](http://www.hiv.lanl.gov/content/sequence/HIV/COMPENDIUM/1998/INTRO/landmarks.pdf)

**(B)** The black bars represent previously designated HIV-1 exons. **(C)** Exon 3 containing mRNAs and RT-PCR oligonucleotides relevant to this work.
